# Supplementary material for: Identifying Tightly Regulated and Variably Expressed Networks by Differential Rank Conservation (DIRAC)
Source: PubMed Central journal article supplement (PMC2877722; doi:10.1371/journal.pcbi.1000792), 2010-05-27
Supplement: pcbi.1000792.s001.pdf [file pcbi.1000792.s001.pdf]

**Table S1.** Increasing network completeness with NCBI gene name information.

*BioCarta network mapping statistics before replacing dataset gene names with NCBI synonyms:*

| Dataset | Num. dataset genes | Num. network genes | Num. matched | % matched network genes | Num. networks equal to or above x% completion |     |     |     |     |     |
|---------|--------------------|--------------------|--------------|-------------------------|-----------------------------------------------|-----|-----|-----|-----|-----|
|         |                    |                    |              |                         | 100%                                          | 90% | 80% | 70% | 60% | 50% |
| A       | 30,761             | 1,296              | 1,241        | 0.96                    | 155                                           | 228 | 243 | 246 | 247 | 248 |
| B       | 9,724              | 1,296              | 1,052        | 0.81                    | 60                                            | 127 | 204 | 228 | 239 | 246 |
| C       | 3,983              | 1,296              | 622          | 0.48                    | 1                                             | 1   | 6   | 28  | 90  | 169 |
| E       | 20,021             | 1,296              | 1,105        | 0.85                    | 37                                            | 101 | 208 | 233 | 244 | 247 |
| D       | 9,724              | 1,296              | 1,052        | 0.81                    | 60                                            | 127 | 204 | 228 | 239 | 246 |
| F       | 14,941             | 1,296              | 1,140        | 0.88                    | 74                                            | 173 | 225 | 238 | 245 | 248 |
| G       | 5,600              | 1,296              | 908          | 0.70                    | 25                                            | 61  | 150 | 195 | 227 | 244 |
| H       | 9,101              | 1,296              | 1,077        | 0.83                    | 70                                            | 143 | 217 | 233 | 240 | 247 |
| I,J,K   | 9,724              | 1,296              | 1,052        | 0.81                    | 60                                            | 127 | 204 | 228 | 239 | 246 |

*BioCarta network mapping statistics after replacing dataset gene names with NCBI synonyms:*

| Dataset | Num. dataset genes | Num. network genes | Num. matched | % matched network genes | Num. networks equal to or above x% completion |     |     |     |     |     |
|---------|--------------------|--------------------|--------------|-------------------------|-----------------------------------------------|-----|-----|-----|-----|-----|
|         |                    |                    |              |                         | 100%                                          | 90% | 80% | 70% | 60% | 50% |
| A       | 30,761             | 1,296              | 1,279        | 0.99                    | 201                                           | 245 | 248 | 248 | 248 | 248 |
| B       | 9,724              | 1,296              | 1,130        | 0.87                    | 95                                            | 178 | 230 | 239 | 247 | 248 |
| C       | 3,983              | 1,296              | 681          | 0.53                    | 2                                             | 2   | 17  | 51  | 125 | 195 |
| D       | 9,724              | 1,296              | 1,130        | 0.87                    | 95                                            | 178 | 230 | 239 | 247 | 248 |
| E       | 20,021             | 1,296              | 1,193        | 0.92                    | 66                                            | 161 | 235 | 247 | 248 | 248 |
| F       | 14,941             | 1,296              | 1,224        | 0.94                    | 129                                           | 222 | 244 | 247 | 248 | 248 |
| G       | 5,600              | 1,296              | 974          | 0.75                    | 42                                            | 97  | 182 | 217 | 237 | 245 |
| H       | 9,101              | 1,296              | 1,134        | 0.88                    | 97                                            | 181 | 233 | 241 | 245 | 248 |
| I,J,K   | 9,724              | 1,296              | 1,130        | 0.87                    | 95                                            | 178 | 230 | 239 | 247 | 248 |
